# Supplementary material
Source: bioRxiv or medRxiv preprint supplement (https://www.biorxiv.org/highwire/filestream/117347/field_highwire_adjunct_files/0/343640-1.pdf)
Supplement: Supplementary file [file 343640-1.pdf]

1  
2  
3  
4  
5  
6  
7  
8  
9  
10  
11  
12  
13  
14  
15  
16  
17  
18  
19  
20

Supplementary Information for

Culturing the ubiquitous freshwater actinobacterial acI lineage by supplying  
a biochemical ‘helper’ catalase

Suhyun Kim, Inam Kang, Ji-Hui Seo, and Jang-Cheon Cho

Department of Biological Sciences, Inha University, Incheon 22212, Republic of Korea

Corresponding author: Jang-Cheon Cho

Email: [chojc@inha.ac.kr](mailto:chojc@inha.ac.kr)

This file includes:

Supplementary information text

Figs. S1 to S9

Tables S1 to S5

References for SI reference citations

## Supplementary Information Text

**Description of two proposed 'Candidatus' species.** The average nucleotide identity (ANI) value calculated from genome sequences between strain IMCC25003 and '*Ca. Planktophila sulfonica*' MMS-IA-56 was 84% and between strains MCC26103 and '*Ca. Planktophila lacus*' MMS-21-148 was 78%, which were both below the 95–96% cut-off value for bacterial species demarcation (1, 2). Analysis of genomic DNA-DNA relatedness and differential phenotypic characteristics indicated that strains IMCC25003 and IMCC26103 each represent novel species of the genus '*Candidatus Planktophila*'. However, because the two strains did not grow on a defined medium or a synthetic medium but replicated only in complex natural lake water media, limiting the deposition of the acI strains in culture collections, we propose the provisional names '*Candidatus Planktophila rubra*' for strain IMCC25003 and '*Candidatus Planktophila aquatilis*' for strain IMCC26103.

**'Candidatus Planktophila rubra'** (ru'bra. L. fem. adj. *rubra* reddish, pertaining to the reddish color of cells)

Represented by a cultured bacterial strain, IMCC25003. Gram-positive, aerobic, red-pigmented, non-motile, and chemoheterotrophic. Cells are curved rods with biovolume of  $0.041 \mu\text{m}^3$ , 0.46–1.23  $\mu\text{m}$  (average 0.68  $\mu\text{m}$ ) long and 0.25–0.37  $\mu\text{m}$  (average 0.30  $\mu\text{m}$ ) wide. Grows in FAMV+CM+AA supplemented with  $>0.5 \text{ U mL}^{-1}$  catalase but does not grow in any liquid medium devoid of catalase and on any solid agar medium. Growth occurs at 10–30°C (optimum, 25°C). No single carbon sources enhance cellular growth. Requires sulfur-containing amino acids (methionine and cysteine) but prefers methionine. The major fatty acids ( $>10\%$ ) are summed feature 3 ( $\text{C}_{16:1} \omega 7c$  and/or  $\text{C}_{16:1} \omega 7c$ , 45.8%),  $\text{C}_{16:0}$  (23.1%), and  $\text{C}_{14:0}$  (18.2%). Strain IMCC25003 has a genome size of 1.354 Mbp with DNA G+C content of 49.1%. The complete genome sequence of strain IMCC25003 is available in GenBank (CP029557). Phylogenetically belongs to the acI-A1 tribe.

The representative strain IMCC25003 was isolated from a freshwater lake, Lake Soyang, Republic of Korea, using a dilution-to-extinction culturing.

48 '***Candidatus Planktophila aquatilis***' (a.qua.ti'lis. L. fem. adj. *aquatilis* living, growing, or found, in or near  
49 water, aquatic).

50 Represented by a cultured bacterial strain, IMCC26103. Gram-positive, aerobic, red-pigmented, non-  
51 motile, and chemoheterotrophic. Cells are curved rods with biovolume of  $0.061 \mu\text{m}^3$ ,  $0.49\text{--}1.23 \mu\text{m}$   
52 (average  $0.88 \mu\text{m}$ ) long and  $0.22\text{--}0.39 \mu\text{m}$  (average  $0.31 \mu\text{m}$ ) wide. Grows in FAMV+CM+AA  
53 supplemented with  $>0.5 \text{ U mL}^{-1}$  catalase but does not grow in any liquid medium devoid of catalase and on  
54 any solid agar medium. Growth occurs at  $10\text{--}30^\circ\text{C}$  (optimum,  $25^\circ\text{C}$ ). D-ribose and D-glucose enhance the  
55 cellular growth. Requires sulfur-containing amino acids (methionine and cysteine) but prefers cysteine. The  
56 major fatty acids ( $>10\%$ ) are  $\text{C}_{16:0}$  (28.5%),  $\text{C}_{18:1} \omega 9c$  (25.8%), summed feature 3 ( $\text{C}_{16:1} \omega 7c$  and/or  $\text{C}_{16:1}$   
57  $\omega 7c$ , 12.3%), and  $\text{C}_{18:0}$  (10.5%). Strain IMCC26103 has a genome size of 1.457 Mbp with DNA G+C  
58 content of 47.0%. The complete genome sequence of strain IMCC26103 is available in GenBank  
59 (CP029558). Phylogenetically belongs to the acI-A4 tribe.

60 The representative strain IMCC26103 was isolated from a freshwater lake, Lake Soyang, Republic of  
61 Korea, using a dilution-to-extinction culturing.

62

### 63 **Supplementary Materials and Methods**

64 **Measurement of bacterial cell densities.** Bacterial cell densities in all growth experiments were  
65 determined by flow cytometry (Guava easyCyte Plus, Millipore) as described previously (3, 4). After 200  
66  $\mu\text{L}$  of bacterial cultures were stained with SYBR Green I ( $5\times$  final concentration, Invitrogen) for 1 h, each  
67 stained sample was run for 10 s or until total cell counts reached 5000. To accurately measure the cell  
68 counts in the samples with high cell density, the stained sample was diluted to contain less than 200 cells  
69  $\mu\text{L}^{-1}$ .

70

71 **Measurement of *katG* expression by qPCR.** Strain IMCC25003 was grown in triplicate in 4 L of  
72 FAMV+CM+AA supplemented with  $1 \text{ U mL}^{-1}$  of catalase until the early stationary phase. Each 4-L  
73 bacterial culture was harvested by centrifugation at  $20,000 \times g$  for 120 min. To examine the expression of  
74 IMCC25003 *katG* and compare the relative level of gene expression according to  $\text{H}_2\text{O}_2$  concentrations,  
75 harvested cells were treated with different concentrations of  $\text{H}_2\text{O}_2$  (10, 50, and  $100 \mu\text{M}$ ) for 30 min and

76 untreated cells were used as a control. RNA was extracted using TRIzol (Sigma-Aldrich). Reverse  
77 transcription was performed with 1 µg of RNA using qPCRBIO cDNA Synthesis Kit (PCRBIO Systems)  
78 and real-time qPCR was conducted using qPCRBIO SyGreen Blue Mix Lo-ROX (PCRBIO Systems) in a  
79 real-time thermal cycler (Rotor-Gene 3000, Corbett Research). The *katG* primer set (forward, 5'-  
80 CATGGCGATGAATGATGAAG-3'; reverse, 5'-GCTGTTCTTCCAGCCAAGTC-3') for targeting *katG* of  
81 IMCC25003 was used to evaluate gene expression and the GAPDH gene of IMCC25003 was employed as  
82 a housekeeping gene with the GAPDH primer set (forward, 5'-GTTTCAGCGACAGACCTCACA-3';  
83 reverse, 5'-TGGTGAGCTGTGAATCGAAG-3').

84

85 **Expression, purification, and characterization of KatG from IMCC25003.** The gene encoding catalase-  
86 peroxidase (KatG) of IMCC25003 was amplified by PCR using the following primers: forward, 5'-  
87 CATATGATGACTCAAGAATCAACTCC-3'; reverse, 5'-CTCGAGTTACTTCTTCTTTGAC-3'. The  
88 PCR product was inserted into the pET-15b vector (Novagen) and expressed in *Escherichia coli* BL21  
89 (DE3) using 1 mM isopropyl-β-D-thiogalatoside (Sigma-Aldrich). The expressed KatG-His recombinant  
90 protein was purified using a gravity-flow Ni<sup>2+</sup>-nitrilotriacetic acid affinity column (Novagen). The high  
91 concentration of salts used for elution in the affinity column was removed using a PD-10 desalting column  
92 (GE Healthcare). To increase protein purity, the eluted fractions were applied to a Superose-12 FPLC  
93 column (10 × 300 mm, GE Healthcare) equilibrated with 50 mM potassium phosphate buffer (pH 7.0). The  
94 purified recombinant proteins were concentrated to approximately 10 mg mL<sup>-1</sup> in Centricon tubes (MWCO  
95 10,000 Da; Millipore) and stored at 4°C. All purification steps were carried out at 4°C or on ice.

96 The native molecular weight of IMCC25003 KatG was determined by size exclusion chromatography  
97 on a Superose-12 FPLC column (10 × 300 mm, GE Healthcare) equilibrated with 50 mM potassium  
98 phosphate buffer (pH 7.0). The molecular weights of the subunits were determined by discontinuous  
99 sodium dodecyl sulfate-polyacrylamide gel electrophoresis (SDS-PAGE) according to the standard  
100 Laemmli method. Catalytic activity of recombinant IMCC25003 KatG was determined using a  
101 spectrophotometric assay by measuring the decomposition of H<sub>2</sub>O<sub>2</sub> at 240 nm. Catalase-specific activity  
102 was quantified by allowing varying amounts of enzyme (0–1.0 µg for bovine catalase; 0–5.0 µg for  
103 IMCC25003 KatG) to react with 5 mM H<sub>2</sub>O<sub>2</sub> in 50 mM potassium phosphate buffer (pH 7.0) at 25°C. The

104 absorption coefficient at 240 nm, pH 7.0, and 25°C for H<sub>2</sub>O<sub>2</sub> was determined to be 49.8 M<sup>-1</sup> cm<sup>-1</sup>. Kinetic  
105 parameters were determined in triplicate from initial linear reaction rates of H<sub>2</sub>O<sub>2</sub> ranging from 1 to 10 mM.  
106 The apparent K<sub>m</sub> (mM) and k<sub>cat</sub> (s<sup>-1</sup>) values at these substrate concentrations were determined from a  
107 Lineweaver-Burk plots. Catalase from bovine liver was used as a positive control. In SDS-PAGE, staining  
108 for catalase activity was performed with the ferricyanide negative staining method using 2% (w/v) ferric  
109 chloride and 2% (w/v) potassium ferricyanide solution, and peroxidase activity was detected by double-  
110 staining with 3,3',5,5'-tetramethylbenzidine (5).

111

112 **Phylogenetic analyses based on 16S rRNA gene, whole genome, and KatG protein.** The 16S rRNA  
113 gene sequences of the acI genomes (6-8) were downloaded from the IMG database and GenBank, aligned  
114 using SINA online aligner, and imported into the ARB-SILVA database (SSURef NR 99, release 123).  
115 Multiple alignments of the imported sequences and other reference sequences of the acI lineage were  
116 exported with the 'ssuref:bacteria' filter and used to construct a maximum-likelihood tree in RAxML 8.2.7  
117 with the GTRGAMMA model. Phylogenetic assignment of the sequences was performed as described by  
118 Newton *et al.* (9) and the recently proposed names for the two *Candidatus* genera (8).

119 To build phylogenomic trees, protein sequences predicted in 4 completed acI genomes (7) and single-  
120 cell genomes (6) and 16 recently published acI genomes (8) were downloaded from the IMG database and  
121 NCBI RefSeq database. Downloaded protein sequences were processed using CheckM (10), which  
122 produces concatenated alignment of 43 conserved proteins. This concatenated alignment was used to build  
123 a maximum-likelihood tree using RAxML 8.2.7 with the PROTGAMMAAUTO model.

124 KatG proteins in the acI genomes (listed in *SI Appendix*, Table S4) were searched by BLASTp using the  
125 KatG sequence of IMCC25003 as a query and acI protein sequences downloaded above as a search  
126 database, which revealed a total of 20 acI KatG proteins. Phylogenetic trees of KatG proteins were  
127 constructed to identify the phylogenetic positions of the KatGs found in the acI genomes. Sequences  
128 collected for tree construction included the following: 20 acI KatG proteins, 16 KatG proteins showing  
129 high similarities to acI KatG proteins in BLASTp against the nr database of GenBank, 19 actinobacterial  
130 KatG proteins searched from the genomes representing diverse taxonomic groups of the phylum  
131 *Actinobacteria* (7), and >300 KatG proteins downloaded from PeroxiBase (11)

132 (<http://peroxibase.toulouse.inra.fr>; Category 'Catalase peroxidase' of 'Class I peroxidase superfamily'  
133 under 'Non Animal peroxidase'). After sequence collection, several rounds of alignment and tree building  
134 were performed, and some sequences were excluded because of their short length, poor alignment, or  
135 unstable positioning. Finally, 303 KatG proteins were selected, aligned with Muscle (12) implemented in  
136 the MEGA 6 program, and used to construct a maximum likelihood tree using RAxML (version 8.2.7),  
137 with automatic model selection based on aic criterion (-m PROTGAMMAAUTO --auto-prot=aic). The  
138 selected model was LG likelihood with empirical base frequencies. Grouping of the KatG proteins was  
139 performed as described by Zamocky *et al.* (13).  
140

141 **Supplementary Figures**

142

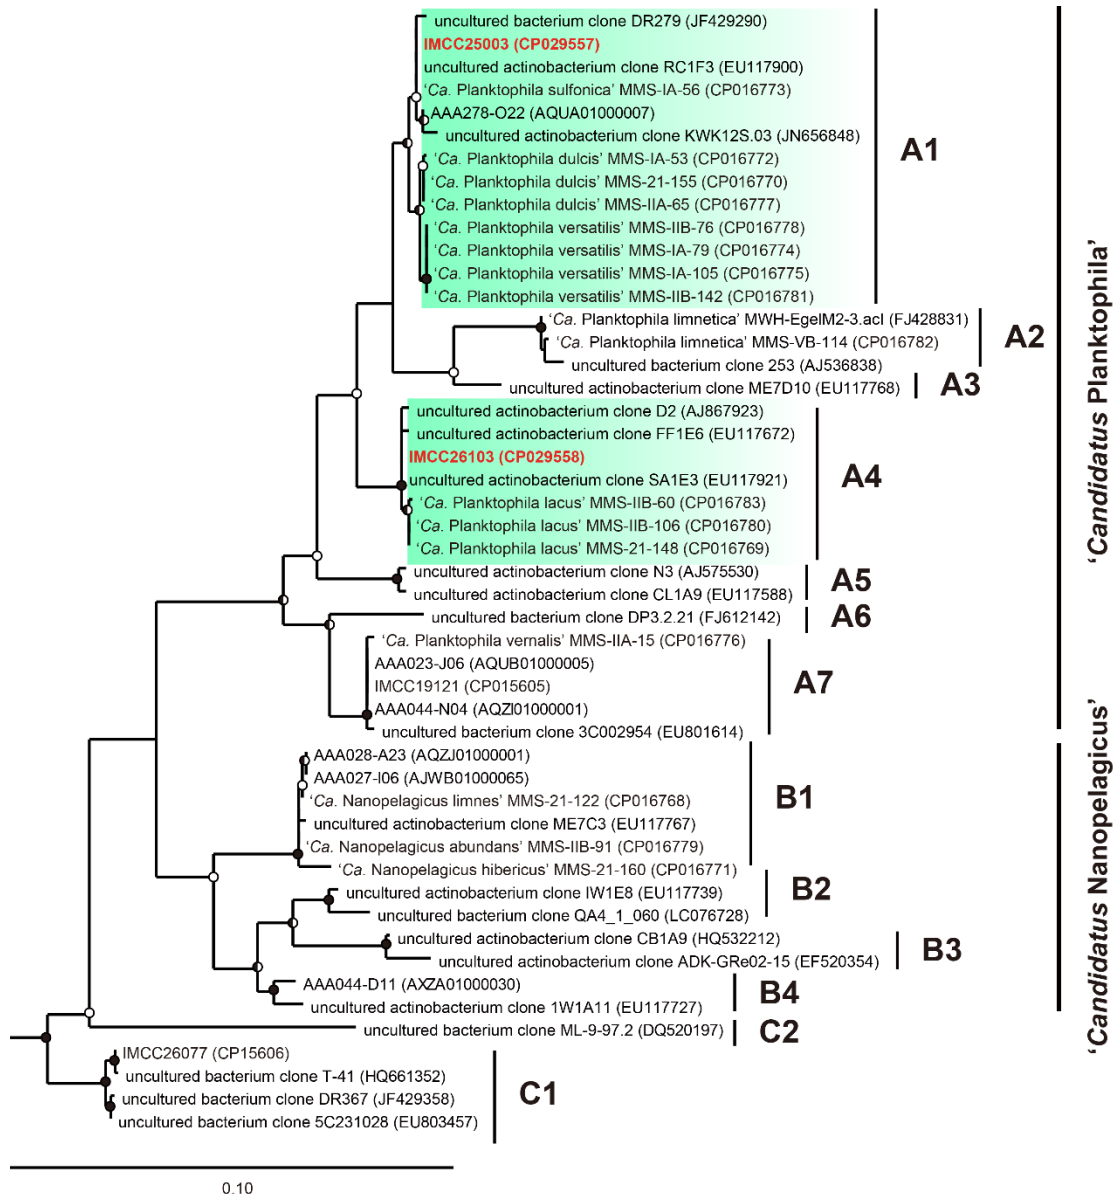

143

144 **Fig. S1.** Maximum-likelihood tree based on 16S rRNA gene sequences showing the phylogenetic position

145 of strains IMCC25003 and IMCC26103. The two strains isolated in this study are marked in red.

146 *Streptomyces sannanensis* (AB184579) and *Streptomyces griseus* (AY999909) were used as outgroup.

147 Bootstrap supporting values (from 600 replicates) are shown at the nodes as filled circles ( $\geq 90\%$ ), half-

148 filled circles ( $\geq 70\%$ ), and empty circles ( $\geq 50\%$ ). Bar, 0.10 substitutions per nucleotide position.

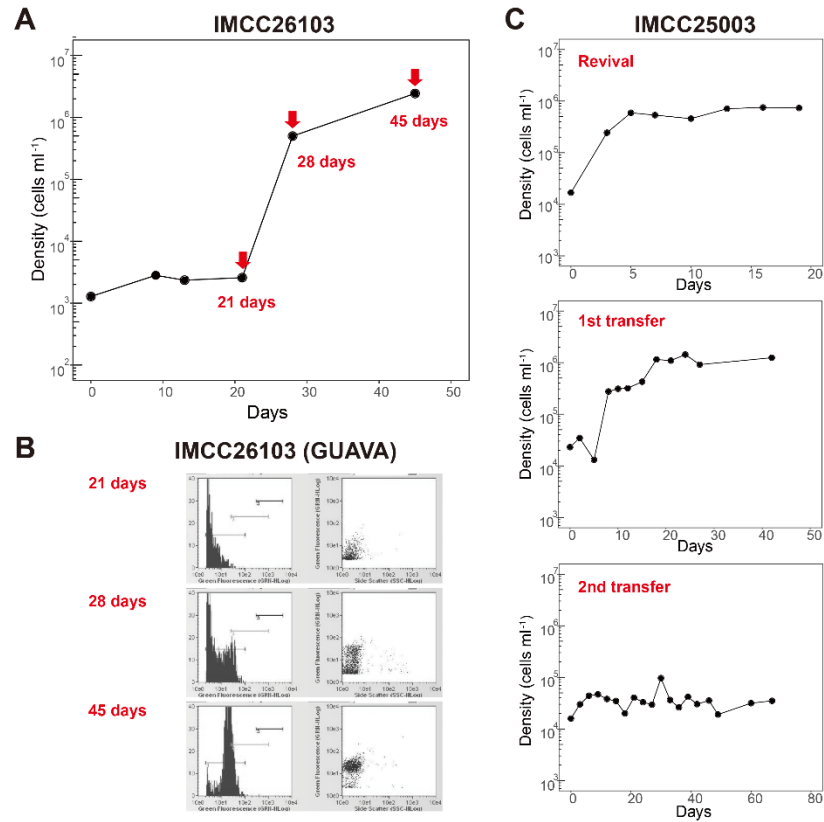

149

150 **Fig. S2.** Revival and transfer cultures of strains IMCC25003 and IMCC26103. (a) Growth curve of a  
 151 revival culture of strain IMCC26103. (b) Flow cytometry plots of strain IMCC26103 obtained at the time  
 152 points indicated in (a). Left, histograms showing the distribution of cell counts (y-axis) according to the  
 153 green fluorescence (x-axis); Right, dot plots showing the distribution of cells according to side scatter (x-  
 154 axis) and green fluorescence (y-axis). (c) Revival and two subsequent transfer cultures of strain  
 155 IMCC25003.



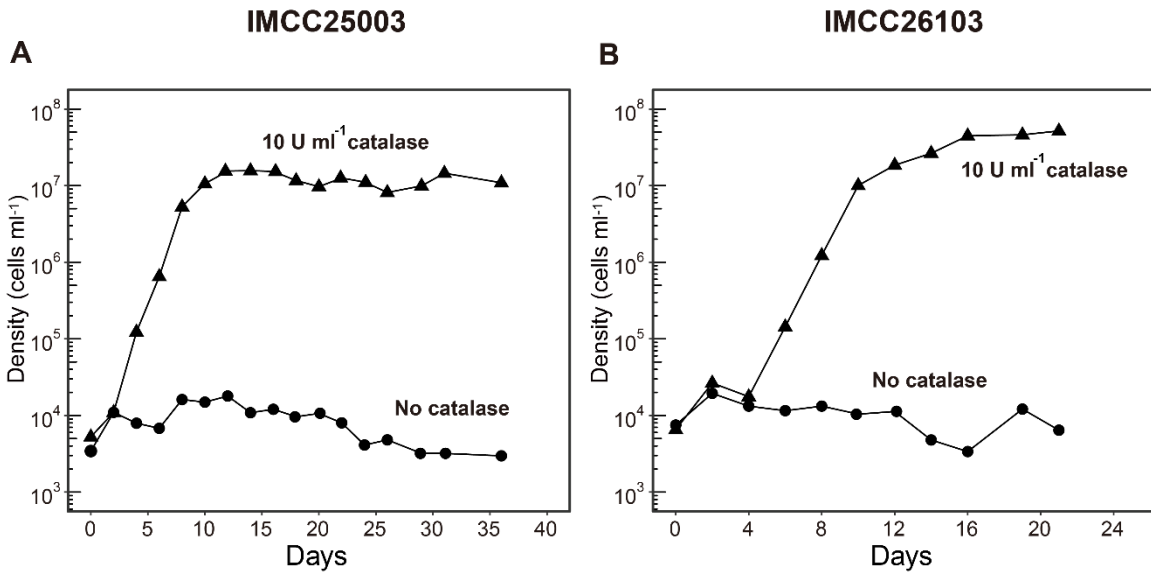

156

157 **Fig. S3.** Growth curves of strains IMCC25003 (a) and IMCC26103 (b) obtained from the revival  
 158 experiment of frozen glycerol stocks using culture medium (FAMV+CM+AA) supplemented with catalase.

159 The triangle symbol represents growth in the medium amended with 10 U mL<sup>-1</sup> catalase, while the circle  
 160 symbol represents growth in the medium without catalase.

161

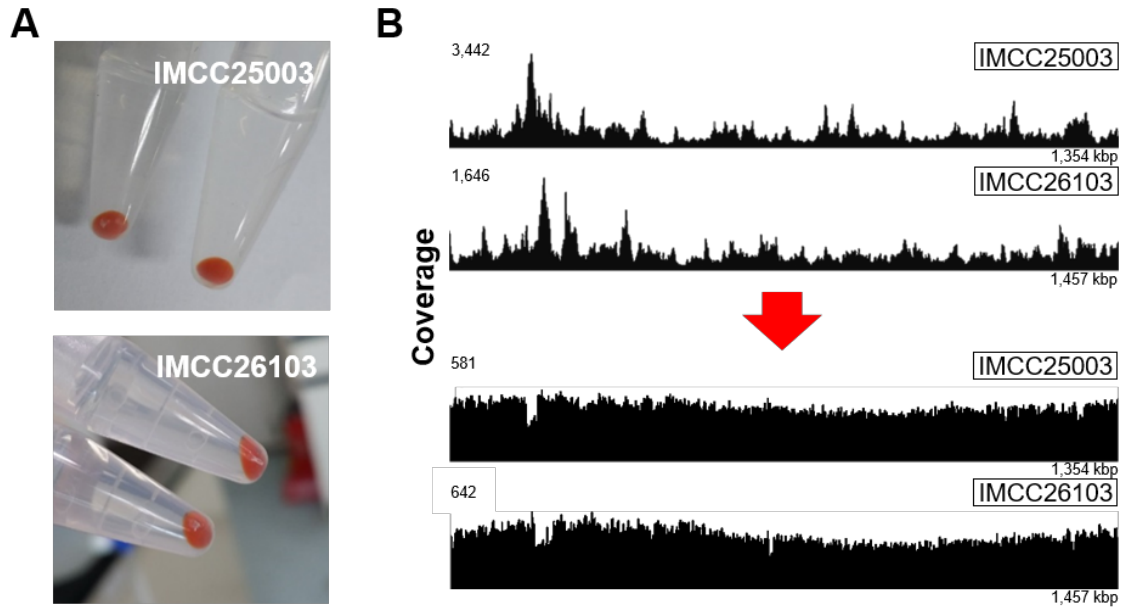

162

163 **Fig. S4.** Genome sequencing using genomic DNA extracted from cultured and harvested cell pellets of the  
 164 acI strains. (a) Cell pellets obtained by centrifugation from 4-L cultures of IMCC25003 (upper) and  
 165 IMCC26103 (lower). Genomic DNA extracted from these cell pellets were used for genome sequencing.  
 166 (b) Coverage variation across the complete genome sequences of the acI strains. The two coverage plots  
 167 above red arrow were obtained from our previous study using whole genome amplification (WGA) (7). The  
 168 two coverage plots below the arrow were obtained from this study using large-scale cultures without WGA.  
 169 Coverage variation was calculated using a 25-bp window based on read mapping. Bar heights were  
 170 normalized in each plot and the maximum coverages are indicated at the upper left corner of each plot.

171

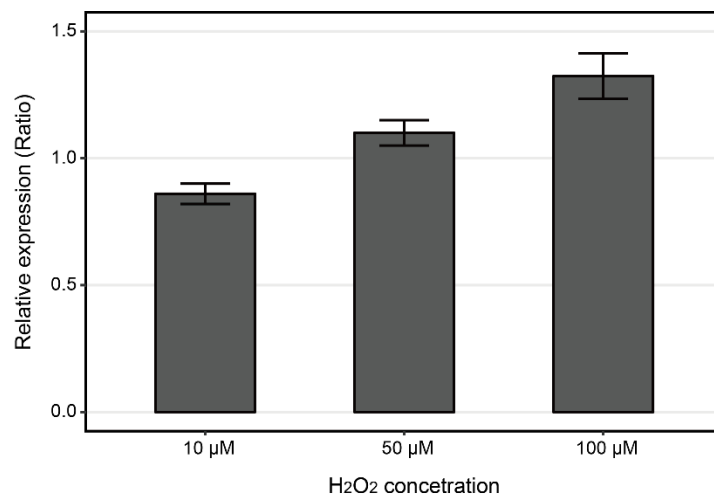

172

173 **Fig. S5.** Increase in IMCC25003 *katG* expression with increasing concentration of H<sub>2</sub>O<sub>2</sub>. Cells of  
174 IMCC25003 were treated with 3 different H<sub>2</sub>O<sub>2</sub> concentrations (10, 50, and 100 μM) for 30 min and total  
175 RNA was used for the analysis of *katG* expression by qPCR. Expression level of *katG* in H<sub>2</sub>O<sub>2</sub>-treated  
176 cultures was compared with that in the control cultures (no H<sub>2</sub>O<sub>2</sub> treatment). FAMV+CM+AA was used as  
177 the culture medium. Error bars indicate standard deviations ( $n = 3$ ).

178

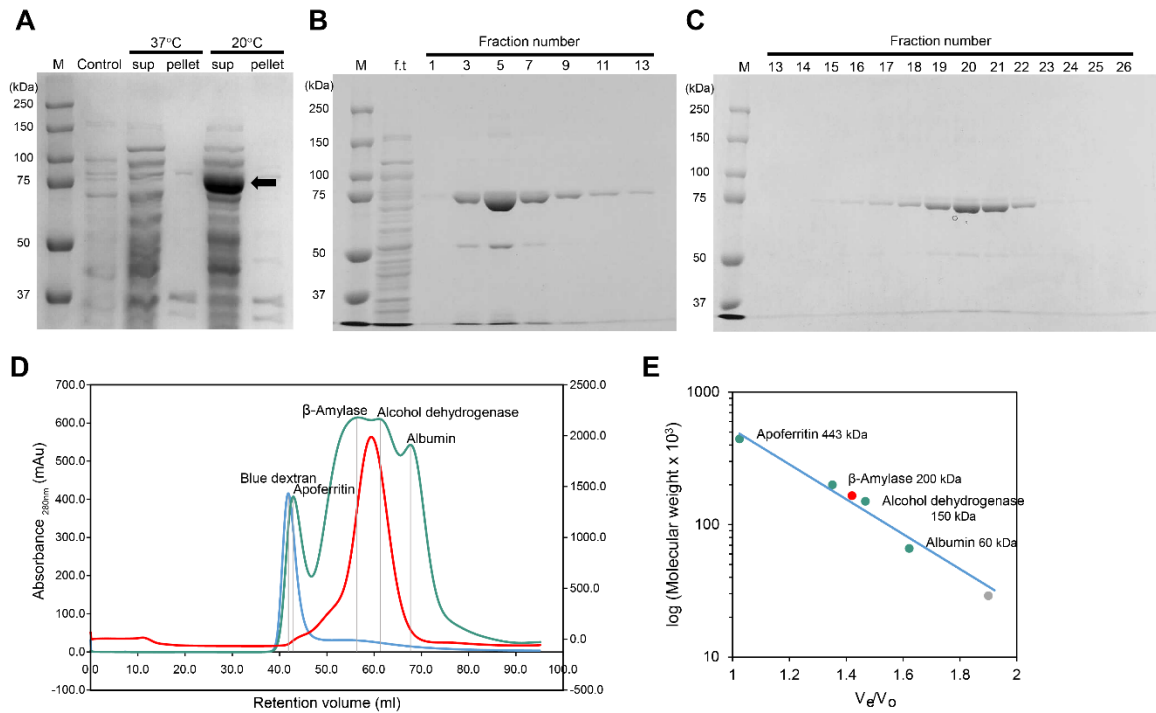

179

180 **Fig. S6.** Expression, purification, and determination of native molecular weight of recombinant  
 181 IMCC25003 KatG. (a) Expression of IMCC25003 KatG in *E. coli* analyzed by SDS-PAGE. The bold  
 182 arrow indicates a band of KatG, which is approximately 82.6 kDa. M, molecular weight size marker;  
 183 control, before induction of expression; sup, supernatant; pellet, cell debris and membrane. Purified  
 184 IMCC25003 KatG bound to a Ni<sup>2+</sup>-nitrilotriacetic acid affinity column (b) and the purified protein through  
 185 a size exclusion superpose-12 column (c), confirmed by SDS-PAGE. M, molecular weight size marker; f.t.,  
 186 unbound flow through fraction. Chromatograms (d) of protein-molecular-weight size markers and  
 187 IMCC25003 KatG, and the molecular-weight calibration curve (e) obtained from protein-molecular-weight  
 188 size markers and IMCC25003 KatG. The chromatogram colored in red and the red dot on the calibration  
 189 curve represent IMCC25003 KatG.

190

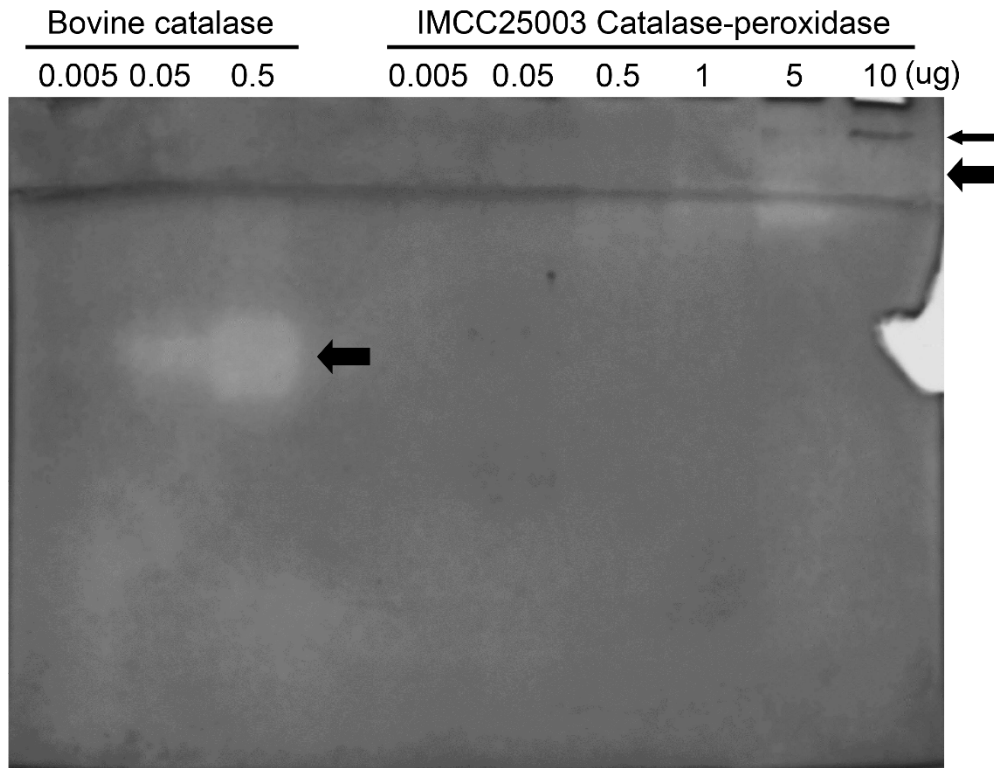

191

192 **Fig. S7.** Catalase and peroxidase activities of purified IMCC25003 KatG and bovine catalase (KatE).

193 Bovine catalase [0.005 (0.01 U), 0.05 (0.1 U), and 0.5 (1 U)  $\mu$ g] and IMCC25003 KatG (0.005, 0.05, 0.5,

194 1, 5, and 10  $\mu$ g) were separated by 8% non-denaturing PAGE. The bold arrows indicate negatively stained

195 catalase activity and the narrow arrow indicates peroxidase activity stained by 3,3',5,5'-

196 tetramethylbenzidine.

197

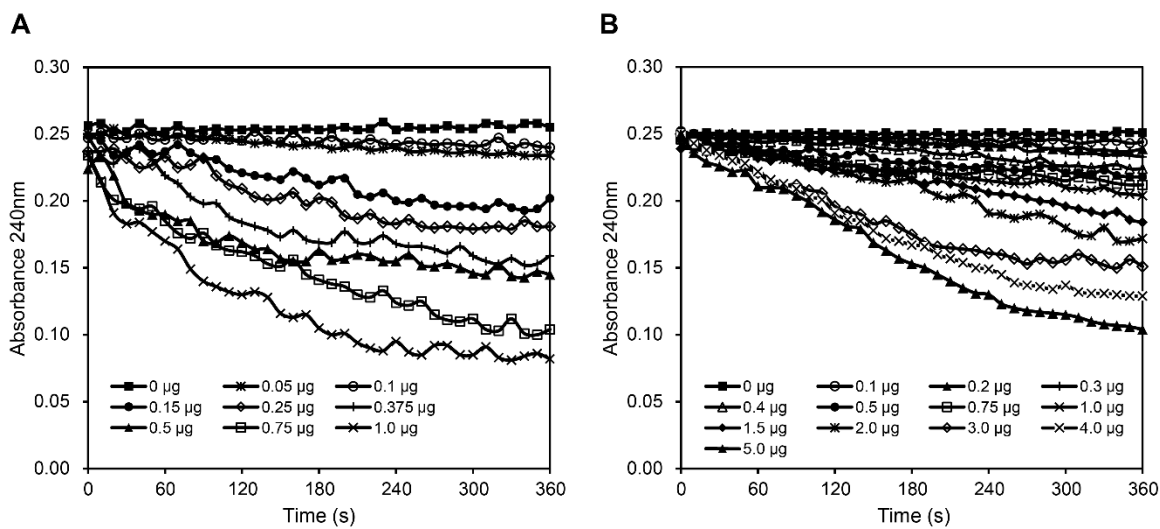

198

199 **Fig. S8.** Kinetic curves of H<sub>2</sub>O<sub>2</sub> decomposition by IMCC25003 KatG and bovine catalase. The curves of  
 200 absorbance at 240 nm over time were generated using varying quantities of (a) bovine catalase (0–1.0 µg)  
 201 and (b) IMCC25003 KatG (0–5.0 µg).

202

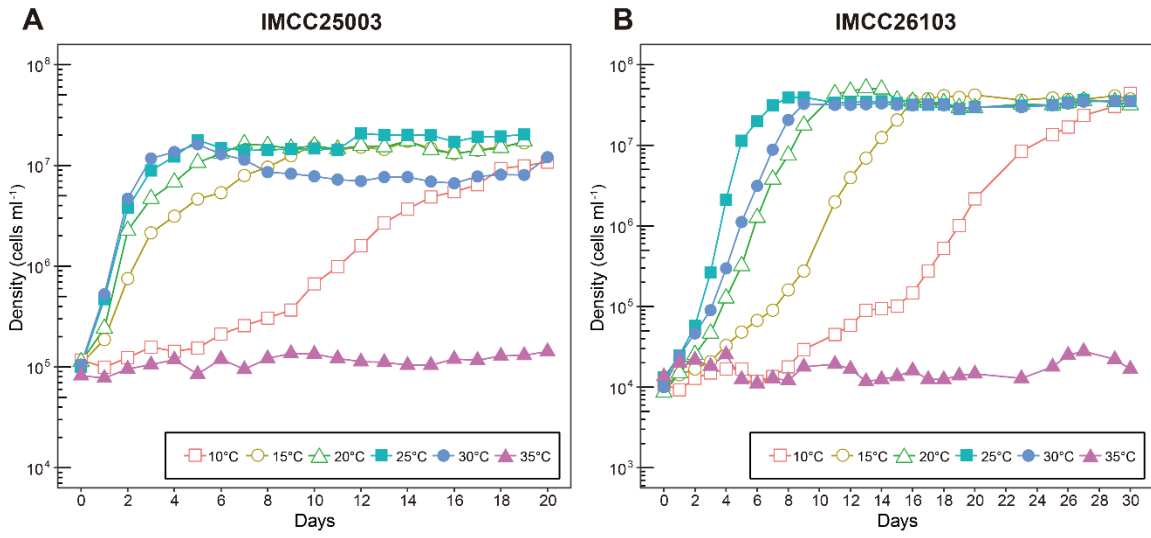

203

204 **Fig. S9.** Growth curves of strain IMCC25003 (a) and strain IMCC26103 (b) at different temperatures.

205

206 **Supplementary Tables**

207

208 **Table S1.** Media used in this study and their composition.

| <b>Components of media</b>               |                                                                                 |                     | 209 |
|------------------------------------------|---------------------------------------------------------------------------------|---------------------|-----|
|                                          |                                                                                 |                     | 210 |
| Components (abbreviation)                | Compound(s)                                                                     | Final concentration |     |
| Ammonium (N)                             | NH <sub>4</sub> Cl                                                              | 10 μM               | 212 |
| Phosphate (P)                            | KH <sub>2</sub> PO <sub>4</sub>                                                 | 10 μM               |     |
| Trace metals (TM)                        | FeCl <sub>3</sub> ·6H <sub>2</sub> O                                            | 117 nM              |     |
|                                          | MnCl <sub>2</sub> ·4H <sub>2</sub> O                                            | 9 nM                |     |
|                                          | ZnSO <sub>4</sub> ·7H <sub>2</sub> O                                            | 800 pM              |     |
|                                          | CoCl <sub>2</sub> ·6H <sub>2</sub> O                                            | 500 pM              |     |
|                                          | Na <sub>2</sub> MoO <sub>4</sub> ·2H <sub>2</sub> O                             | 300 pM              |     |
|                                          | Na <sub>2</sub> SeO <sub>3</sub>                                                | 1 nM                |     |
|                                          | NiCl <sub>2</sub> ·6H <sub>2</sub> O                                            | 1 nM                |     |
| Vitamin mixture (V)                      | Thiamine·HCl                                                                    | 59 nM               |     |
|                                          | Niacin                                                                          | 81 nM               |     |
|                                          | Ca-Pantothenate                                                                 | 84 nM               |     |
|                                          | Pyridoxine                                                                      | 59 nM               |     |
|                                          | Biotin                                                                          | 409 pM              |     |
|                                          | Folic acid                                                                      | 453 pM              |     |
|                                          | Vitamin B12                                                                     | 70 pM               |     |
|                                          | Myo-inositol                                                                    | 555 nM              |     |
| Carbon mixture (CM)                      | <i>p</i> -Aminobenzoic Acid                                                     | 7 nM                |     |
|                                          | Pyruvate                                                                        | 50 μM               |     |
|                                          | D-Glucose                                                                       | 5 μM                |     |
|                                          | <i>N</i> -Acetyl-D-glucosamine                                                  | 5 μM                |     |
|                                          | D-Ribose                                                                        | 5 μM                |     |
| 20 proteinogenic amino acid mixture (AA) | Methyl alcohol                                                                  | 5 μM                |     |
|                                          | Each amino acid                                                                 | 100 nM, each        |     |
| <b>Media definition</b>                  |                                                                                 |                     |     |
| Media                                    | Definition                                                                      |                     |     |
| FAM                                      | 0.2 μm-filtered and autoclaved freshwater medium supplemented with N, P, and TM |                     |     |
| FAMV                                     | FAM supplemented with V                                                         |                     |     |
| FAMV+CM                                  | FAMV supplemented with CM                                                       |                     |     |
| FAMV+AA                                  | FAMV supplemented with AA                                                       |                     |     |
| FAMV+CM+AA                               | FAMV supplemented with CM and AA                                                |                     |     |



213 **Table S2.** Trials to establish pure culture of strain IMCC25003.

| Trial       | Media composition         | Additional substrate                        | Reference              |
|-------------|---------------------------|---------------------------------------------|------------------------|
| 1st attempt | FAMV                      |                                             |                        |
|             | FAMV+CM                   |                                             |                        |
|             | FAMV+AA                   | 0.5×, 1×, 5×, and 10× of CM                 |                        |
|             | AFM <sup>a</sup> +V+CM+AA |                                             |                        |
|             | FM <sup>b</sup> +V+CM+AA  |                                             |                        |
| 2nd attempt | FAMV+CM+AA                | 20 μM acetate                               | [(14)]                 |
|             |                           | 20 μM oxaloacetate                          | [(6)]                  |
|             |                           | 20 μM putrescine                            | [(6, 15)]              |
|             |                           | 20 μM glycerol                              | [(6)]                  |
|             |                           | 20 μM xylose                                | [(15, 16)]             |
|             |                           | 1 mg L <sup>-1</sup> proteose peptone No. 3 |                        |
|             |                           | 1 mg L <sup>-1</sup> yeast extract          |                        |
| 3rd attempt | FAMV+CM+AA                | 1:20 diluted spent medium <sup>c</sup>      | [(15, 17)], This study |
| 4th attempt | FAMV+CM+AA                | 10 U mL <sup>-1</sup> catalase              |                        |

214 <sup>a</sup>AFM, Artificial freshwater medium (18). <sup>b</sup>FM, 0.1 μm-filtered but non-autoclaved freshwater medium.

215 <sup>c</sup>Spent medium, a spent medium of the genus *Limnohabitans* filtrated through 0.1 μm pore-size membrane  
 216 after cultivation of *Limnohabitans* sp. IMCC26003. For the media abbreviations, refer to Supplementary  
 217 Table S1.

218

219 **Table S3.** Kinetic parameters of various catalase-peroxidases and bovine catalase.

| Source                                               | Molecular weight | Structure | Specific activity (Units mg <sup>-1</sup> ) | K <sub>m</sub> (mM) | k <sub>cat</sub> (s <sup>-1</sup> ) | k <sub>cat</sub> /K <sub>m</sub> (M <sup>-1</sup> s <sup>-1</sup> ) | pI               | Reference  |
|------------------------------------------------------|------------------|-----------|---------------------------------------------|---------------------|-------------------------------------|---------------------------------------------------------------------|------------------|------------|
| IMCC25003 <sup>a</sup>                               | 165,000          | A2        | 179.3                                       | 11.7                | 9.05 × 10 <sup>2</sup>              | 8.01 × 10 <sup>4</sup>                                              | 7.6 <sup>b</sup> | This study |
| <i>Archaeoglobus fulgidus</i> <sup>a</sup>           | NA               | NA        | 5,280                                       | 3.8                 | 7.77 × 10 <sup>3</sup>              | 2.04 × 10 <sup>6</sup>                                              | 5.6 <sup>b</sup> | [(19)]     |
| <i>Bacillus selenatarsenatis</i> SF-1                | 165,000          | A2        | 3,375                                       | 2.6                 | 1.15 × 10 <sup>4</sup>              | 4.41 × 10 <sup>6</sup>                                              | 6.0              | [(20)]     |
| <i>Burkholderia pseudomallei</i> <sup>a</sup>        | NA               | NA        | 3,630                                       | 4.5                 | 5.68 × 10 <sup>3</sup>              | 1.26 × 10 <sup>6</sup>                                              | 5.9 <sup>b</sup> | [(19)]     |
| <i>Escherichia coli</i> K10                          | 337,000          | A4        | 1,486.5                                     | 3.9                 | 1.63 × 10 <sup>4</sup>              | 4.19 × 10 <sup>6</sup>                                              | 5.1 <sup>b</sup> | [(21)]     |
| <i>Escherichia coli</i> O157:H7                      | NA               | NA        | NA                                          | 4.0                 | 1.40 × 10 <sup>4</sup>              | 3.50 × 10 <sup>6</sup>                                              | 5.1 <sup>b</sup> | [(22)]     |
| <i>Geobacillus stearothermophilus</i> <sup>a</sup>   | NA               | NA        | 3,120                                       | 4.4                 | 1.40 × 10 <sup>3</sup>              | 3.18 × 10 <sup>5</sup>                                              | 5.2              | [(23)]     |
| <i>Halobacterium salinarum</i>                       | 240,000          | A4        | 43.2                                        | 3.7                 | NA                                  | NA                                                                  | 3.8              | [(24)]     |
| <i>Mycobacterium smegmatis</i>                       | NA               | NA        | NA                                          | 1.4                 | 2.38 × 10 <sup>3</sup>              | 1.70 × 10 <sup>6</sup>                                              | 5.0 <sup>b</sup> | [(25)]     |
| <i>Mycobacterium tuberculosis</i> <sup>a</sup>       | 175,000          | A2        | 2,420                                       | 5.2                 | 1.01 × 10 <sup>4</sup>              | 1.94 × 10 <sup>6</sup>                                              | 5.1              | [(26)]     |
| <i>Rhodobacter capsulatus</i>                        | 236,000          | A4        | 7,800                                       | 4.2                 | NA                                  | NA                                                                  | 4.5              | [(27)]     |
| <i>Rhodobacter capsulatus</i> <sup>a</sup>           | NA               | NA        | 4,830                                       | 3.7                 | 6.64 × 10 <sup>3</sup>              | 1.79 × 10 <sup>6</sup>                                              | 5.1 <sup>b</sup> | [(19)]     |
| <i>Synechococcus elongatus</i> PCC 6301 <sup>a</sup> | 165,000          | A2        | 1,491                                       | 4.8                 | 8.85 × 10 <sup>3</sup>              | 1.84 × 10 <sup>6</sup>                                              | 4.6              | [(28)]     |
| <i>Synechococcus elongatus</i> PCC 6301              | 165,000          | A2        | NA                                          | 4.3                 | 7.20 × 10 <sup>3</sup>              | 1.67 × 10 <sup>6</sup>                                              | 5.1 <sup>b</sup> | [(29)]     |
| <i>Synechococcus elongates</i> PCC 7942 <sup>a</sup> | NA               | NA        | NA                                          | 4.2                 | 2.60 × 10 <sup>4</sup>              | 6.19 × 10 <sup>6</sup>                                              | 5.1 <sup>b</sup> | [(30)]     |
| <i>Synechocystis</i> sp. PCC 6803 <sup>a</sup>       | 170,000          | A2        | 5,420                                       | 4.9                 | 3.50 × 10 <sup>3</sup>              | 7.14 × 10 <sup>2</sup>                                              | 5.4              | [(31)]     |
| <i>Thermoascus aurantiacus</i>                       | 330,000          | A4        | NA                                          | 48.0                | 1.07 × 10 <sup>5</sup>              | 2.22 × 10 <sup>6</sup>                                              | 4.5              | [(32)]     |
| <i>Thermus brockianus</i>                            | 178,000          | A4        | 5,300                                       | 35.5                | 6.00 × 10 <sup>3</sup>              | 1.69 × 10 <sup>5</sup>                                              | 4.7              | [(33)]     |
| <i>Bos taurus</i> <sup>c</sup>                       | 240,000          | A4        | 1980.3                                      | 20.6                | 9.05 × 10 <sup>4</sup>              | 8.01 × 10 <sup>4</sup>                                              | 5.4              | This study |

220 <sup>a</sup>Biochemical properties were determined using recombinant catalase-peroxidase. <sup>b</sup>Theoretical pI values were estimated based on amino acids sequences. <sup>c</sup>The

221 monofunctional bovine catalase which was amended to culture media of IMCC25003 was used as an experimental positive control. NA, not available.

222

**Table S4.** List of *acl* genomes used in this study and the presence or absence of *katG* gene.

| Tribe                                      | Organism name                             | Genome ID               | Isolation site    | Complete | No. of Scaffolds | Genome size (bp) | Length of KatG (aa) |
|--------------------------------------------|-------------------------------------------|-------------------------|-------------------|----------|------------------|------------------|---------------------|
| A1                                         | Actinobacteria bacterium IMCC25003        | 2602042019 <sup>a</sup> | Lake Soyang       | O        | 1                | 1,353,947        | 746                 |
|                                            | actinobacterium SCGC AAA278-O22           | 2236661007 <sup>a</sup> | Lake Mendota      | X        | 43               | 1,138,490        | X                   |
|                                            | actinobacterium SCGC AAA027-M14           | 2236661003 <sup>a</sup> | Lake Mendota      | X        | 22               | 822,296          | 725                 |
|                                            | 'Ca. Planktophilia dulcis' MMS-IIA-65     | CP016777 <sup>b</sup>   | Lake Zurich       | O        | 1                | 1,348,019        | 732                 |
|                                            | 'Ca. Planktophilia dulcis' MMS-IA-53      | CP016772 <sup>b</sup>   | Lake Zurich       | O        | 1                | 1,365,934        | 732                 |
|                                            | 'Ca. Planktophilia dulcis' MMS-21-155     | CP016770 <sup>b</sup>   | Lake Zurich       | O        | 1                | 1,361,776        | 732                 |
|                                            | 'Ca. Planktophilia sulfonica' MMS-IA-56   | CP016773 <sup>b</sup>   | Lake Zurich       | O        | 1                | 1,344,614        | 747                 |
|                                            | 'Ca. Planktophilia versatilis' MMS-IIB-76 | CP016778 <sup>b</sup>   | Lake Zurich       | O        | 1                | 1,325,420        | 733                 |
|                                            | 'Ca. Planktophilia versatilis' MMS-IA-79  | CP016774 <sup>b</sup>   | Lake Zurich       | O        | 1                | 1,331,009        | 733                 |
|                                            | 'Ca. Planktophilia versatilis' MMS-IA-105 | CP016775 <sup>b</sup>   | Lake Zurich       | O        | 1                | 1,326,591        | 733                 |
| 'Ca. Planktophilia versatilis' MMS-IIB-142 | CP016781 <sup>b</sup>                     | Lake Zurich             | O                 | 1        | 1,266,983        | 733              |                     |
| A2                                         | 'Ca. Planktophilia limnetica' MMS-VB-114  | CP016782 <sup>b</sup>   | Lake Zurich       | O        | 1                | 1,328,793        | 722                 |
| A4                                         | Actinobacteria bacterium IMCC26103        | 2602042020 <sup>a</sup> | Lake Soyang       | O        | 1                | 1,456,516        | X                   |
|                                            | 'Ca. Planktophilia lacus' MMS-IIB-106     | CP016780 <sup>b</sup>   | Lake Zurich       | O        | 1                | 1,384,812        | 721                 |
|                                            | 'Ca. Planktophilia lacus' MMS-IIB-60      | CP016783 <sup>b</sup>   | Lake Zurich       | O        | 1                | 1,410,107        | 721                 |
|                                            | 'Ca. Planktophilia lacus' MMS-21-148      | CP016769 <sup>b</sup>   | Lake Zurich       | O        | 1                | 1,460,061        | 721                 |
| A5                                         | actinobacterium SCGC AAA044-O16           | 2606217200 <sup>a</sup> | NA                | X        | 17               | 1,313,698        | 718                 |
|                                            | actinobacterium SCGC AAA028-G02           | 2606217191 <sup>a</sup> | NA                | X        | 18               | 1,231,401        | 718                 |
| A6                                         | actinobacterium SCGC AAA028-E20           | 2602042080 <sup>a</sup> | NA                | X        | 19               | 727,714          | X                   |
|                                            | actinobacterium SCGC AAA028-I14           | 2619618809 <sup>a</sup> | NA                | X        | 11               | 623,569          | 717                 |
| A7                                         | Actinobacteria bacterium IMCC19121        | 2606217181 <sup>a</sup> | Lake Soyang       | O        | 1                | 1,506,415        | X                   |
|                                            | actinobacterium SCGC AAA044-N04           | 2236661005 <sup>a</sup> | Damariscotta Lake | X        | 23               | 1,286,658        | 718                 |
|                                            | actinobacterium SCGC AAA024-D14           | 2264265190 <sup>a</sup> | Sparkling Lake    | X        | 82               | 778,696          | X                   |
|                                            | actinobacterium SCGC AAA023-J06           | 2236661001 <sup>a</sup> | Sparkling Lake    | X        | 98               | 695,943          | X                   |
|                                            | 'Ca. Planktophilia vernalis' MMS-IIA-15   | CP016776 <sup>b</sup>   | Lake Zurich       | O        | 1                | 1,364,004        | 718                 |
| B1                                         | actinobacterium SCGC AAA027-L06           | 2505679121 <sup>a</sup> | Lake Mendota      | X        | 75               | 1,163,583        | X                   |
|                                            | actinobacterium SCGC AAA027-J17           | 2236661002 <sup>a</sup> | Lake Mendota      | X        | 81               | 966,755          | X                   |
|                                            | actinobacterium SCGC AAA278-I18           | 2236661006 <sup>a</sup> | Damariscotta Lake | X        | 54               | 944,397          | X                   |

|    |                                          |                         |                |   |    |           |     |
|----|------------------------------------------|-------------------------|----------------|---|----|-----------|-----|
|    | actinobacterium SCGC AAA028-A23          | 2236661004 <sup>a</sup> | Lake Mendota   | X | 64 | 833,294   | X   |
|    | actinobacterium SCGC AAA023-D18          | 2236661009 <sup>a</sup> | Sparkling Lake | X | 67 | 753,259   | X   |
|    | actinobacterium SCGC AB141-P03           | 2236876028 <sup>a</sup> | Lake Stechlin  | X | 66 | 660,403   | X   |
|    | 'Ca. Nanopelagicus limnes' MMS-21-122    | CP016768 <sup>b</sup>   | Lake Zurich    | O | 1  | 1,238,108 | X   |
|    | 'Ca. Nanopelagicus hibericus' MMS-21-160 | CP016771 <sup>b</sup>   | Lake Zurich    | O | 1  | 1,223,088 | X   |
|    | 'Ca. Nanopelagicus abundans' MMS-IIB-91  | CP016779 <sup>b</sup>   | Lake Zurich    | O | 1  | 1,161,863 | X   |
| B4 | actinobacterium SCGC AAA044-D11          | 2619618811 <sup>a</sup> | NA             | X | 18 | 1,095,756 | 719 |
| C1 | Actinobacteria bacterium IMCC26077       | 2602042021 <sup>a</sup> | Lake Soyang    | O | 1  | 1,551,612 | X   |

224 <sup>a</sup>IMG Genome ID (IMG Taxon ID). <sup>b</sup>GenBank accession number. NA, not available.

225

**Table S5.** Fatty acids composition (%) of two acI strains.

| Fatty acid                                                              | IMCC25003 | IMCC26103 |
|-------------------------------------------------------------------------|-----------|-----------|
| Saturated fatty acids                                                   |           |           |
| C10:0                                                                   |           | 0.46      |
| C12:0                                                                   | 1.64      | 7.93      |
| C14:0                                                                   | 18.22     | 7.85      |
| C16:0                                                                   | 23.11     | 28.45     |
| C17:0                                                                   |           | 1.05      |
| C18:0                                                                   | 2.14      | 10.49     |
| Unsaturated fatty acids                                                 |           |           |
| C15:1 $\omega$ 6 <i>c</i>                                               | 1.11      |           |
| C17:1 $\omega$ 8 <i>c</i>                                               | 2.31      | 1.35      |
| C18:1 $\omega$ 9 <i>c</i>                                               | 2.10      | 25.80     |
| summed feature 3 (16:1 $\omega$ 7 <i>c</i> /16:1 $\omega$ 6 <i>c</i> )  | 45.79     | 12.28     |
| summed feature 5 (18:2 $\omega$ 6,9 <i>c</i> /18:0 ante)                |           | 0.99      |
| summed feature 8 (18:1 $\omega$ 7 <i>c</i> , 18:1 $\omega$ 6 <i>c</i> ) | 3.58      | 3.36      |

228 **References**

- 229 1. Konstantinidis KT, Tiedje JM (2005) Genomic insights that advance the species definition for  
230 prokaryotes. *Proc Natl Acad Sci USA* 102(7):2567-2572.
- 231 2. Kim M, Oh HS, Park SC, Chun J (2014) Towards a taxonomic coherence between average  
232 nucleotide identity and 16S rRNA gene sequence similarity for species demarcation of  
233 prokaryotes. *Int J Syst Evol Microbiol* 64(Pt 2):346-351.
- 234 3. Tripp HJ, et al. (2008) SAR11 marine bacteria require exogenous reduced sulphur for growth.  
235 *Nature* 452(7188):741-744.
- 236 4. Carini P, Steindler L, Beszteri S, Giovannoni SJ (2013) Nutrient requirements for growth of the  
237 extreme oligotroph '*Candidatus Pelagibacter ubique*' HTCC1062 on a defined medium. *ISME J*  
238 7(3):592-602.
- 239 5. Thomas PE, Ryan D, Levin W (1976) An improved staining procedure for the detection of the  
240 peroxidase activity of cytochrome P-450 on sodium dodecyl sulfate polyacrylamide gels. *Anal*  
241 *Biochem* 75(1):168-176.
- 242 6. Ghylin TW, et al. (2014) Comparative single-cell genomics reveals potential ecological niches for  
243 the freshwater acI *Actinobacteria* lineage. *ISME J* 8(12):2503-2516.
- 244 7. Kang I, Kim S, Islam MR, Cho J-C (2017) The first complete genome sequences of the acI  
245 lineage, the most abundant freshwater *Actinobacteria*, obtained by whole-genome-amplification of  
246 dilution-to-extinction cultures. *Sci Rep* 7:42252.
- 247 8. Neuenschwander SM, Ghai R, Pernthaler J, Salcher MM (2018) Microdiversification in genome-  
248 streamlined ubiquitous freshwater *Actinobacteria*. *ISME J* 12(1):185-198.
- 249 9. Newton RJ, Jones SE, Eiler A, McMahon KD, Bertilsson S (2011) A guide to the natural history  
250 of freshwater lake bacteria. *Microbiol Mol Biol Rev* 75(1):14-49.
- 251 10. Parks DH, Imelfort M, Skennerton CT, Hugenholtz P, Tyson GW (2015) CheckM: assessing the  
252 quality of microbial genomes recovered from isolates, single cells, and metagenomes. *Genome Res*  
253 25(7):1043-1055
- 254 11. Fawal N, et al. (2013) PeroxiBase: a database for large-scale evolutionary analysis of peroxidases.  
255 *Nucleic Acids Res* 41:D441-444.

- 256 12. Edgar RC (2004) MUSCLE: multiple sequence alignment with high accuracy and high  
257 throughput. *Nucleic Acids Res* 32(5):1792-1797.
- 258 13. Zamocky M, Gasselhuber B, Furtmuller PG, Obinger C (2012) Molecular evolution of hydrogen  
259 peroxide degrading enzymes. *Arch Biochem Biophys* 525(2):131-144.
- 260 14. Buck U, Grossart H-P, Amann R, Pernthaler J (2009) Substrate incorporation patterns of  
261 bacterioplankton populations in stratified and mixed waters of a humic lake. *Environ Microbiol*  
262 11(7):1854-1865.
- 263 15. Garcia SL, McMahon KD, Grossart H-P, Warnecke F (2014) Successful enrichment of the  
264 ubiquitous freshwater acI *Actinobacteria*. *Environ Microbiol Rep* 6(1):21-27.
- 265 16. Garcia SL, et al. (2013) Metabolic potential of a single cell belonging to one of the most abundant  
266 lineages in freshwater bacterioplankton. *ISME J* 7(1):137-147.
- 267 17. Jezbera J, Sharma AK, Brandt U, Doolittle WF, Hahn MW (2009) 'Candidatus Planktophila  
268 limnetica', an actinobacterium representing one of the most numerically important taxa in  
269 freshwater bacterioplankton. *Int J Syst Evol Microbiol* 59(11):2864-2869.
- 270 18. Kim S, Kang I, Cho JC (2017) Genomic analysis of a freshwater actinobacterium, "Candidatus  
271 Limnosphaera aquatica" Strain IMCC26207, isolated from Lake Soyang. *J Microbiol Biotechnol*  
272 27(4):825-833.
- 273 19. Singh R, et al. (2008) Comparative study of catalase-peroxidases (KatGs). *Arch Biochem Biophys*  
274 471(2):207-214.
- 275 20. Gudelj M, et al. (2001) A catalase-peroxidase from a newly isolated thermoalkaliphilic *Bacillus* sp  
276 with potential for the treatment of textile bleaching effluents. *Extremophiles* 5(6):423-429.
- 277 21. Claiborne A, Fridovich I (1979) Purification of the o-dianisidine peroxidase from *Escherichia coli*  
278 B. Physicochemical characterization and analysis of its dual catalatic and peroxidatic activities. *J*  
279 *Biol Chem* 254(10):4245-4252.
- 280 22. Varnado CL, Hertwig KM, Thomas R, Roberts JK, Goodwin DC (2004) Properties of a novel  
281 periplasmic catalase-peroxidase from *Escherichia coli* O157 : H7. *Arch Biochem Biophys*  
282 421(1):166-174.

- 283 23. Kobayashi C, et al. (1997) Thermal conversion from low- to high-activity forms of catalase I from  
284 *Bacillus stearothermophilus*. *J Biol Chem* 272(37):23011-23016.
- 285 24. Brownpeterson NJ, Salin ML (1993) Purification of a catalase-peroxidase from Halobacterium-  
286 Halobium - characterization of some unique properties of the halophilic enzyme. *J Bacteriol*  
287 175(13):4197-4202.
- 288 25. Marcinkeviciene JA, Magliozzo RS, Blanchard JS (1995) Purification and characterization of the  
289 *Mycobacterium-smegmatis* catalase-peroxidase involved in isoniazid activation. *J Biol Chem*  
290 270(38):22290-22295.
- 291 26. Johnsson K, Froland WA, Schultz PG (1997) Overexpression, purification, and characterization of  
292 the catalase-peroxidase KatG from *Mycobacterium tuberculosis*. *J Biol Chem* 272(5):2834-2840.
- 293 27. Hochman A, Shemesh A (1987) Purification and characterization of a catalase-peroxidase from  
294 the photosynthetic bacterium *Rhodospseudomonas capsulata*. *J Biol Chem* 262(14):6871-6876.
- 295 28. Engleder M, et al. (2000) Nucleotide sequence analysis, overexpression in *Escherichia coli* and  
296 kinetic characterization of *Anacystis nidulans* catalase-peroxidase. *Biochimie* 82(3):211-219.
- 297 29. Obinger C, Regelsberger G, Strasser G, Burner U, Peschek GA (1997) Purification and  
298 characterization of a homodimeric catalase-peroxidase from the cyanobacterium *Anacystis*  
299 *nidulans*. *Biochem Biophys Res Commun* 235(3):545-552.
- 300 30. Mutsuda M, Ishikawa T, Takeda T, Shigeoka S (1996) The catalase-peroxidase of *Synechococcus*  
301 PCC 7942: purification, nucleotide sequence analysis and expression in *Escherichia coli*. *Biochem*  
302 *J* 316:251-257.
- 303 31. Jakopitsch C, et al. (1999) Catalase-peroxidase from the cyanobacterium *Synechocystis* PCC 6803:  
304 cloning, overexpression in *Escherichia coli*, and kinetic characterization. *Biol Chem* 380(9):1087-  
305 1096.
- 306 32. Wang HX, Tokusige Y, Shinoyama H, Fujii T, Urakami T (1998) Purification and characterization  
307 of a thermostable catalase from culture broth of *Thermoascus aurantiacus*. *J Ferment Bioeng*  
308 85(2):169-173.
- 309 33. Thompson VS, Schaller KD, Apel WA (2003) Purification and characterization of a novel thermo-  
310 alkali-stable catalase from *Thermus brockianus*. *Biotechnol Prog* 19(4):1292-1299.
